# Supplementary material for: CD34 orchestrates the formation and actions of microvilli for efficient E-selectin-mediated cell migration
Source: Research Square preprint supplement (doi:10.21203/rs.3.rs-7280176/v1), 2025-09-12
Supplement: Supplementary file 1 [file d1c64af3ba33d950036fae38.docx]

## **SUPPLEMENTARY INFORMATION**

## **CD34 orchestrates the formation and actions of microvilli for efficient E-selectin-mediated cell migration**

Mansour M. Aldehaiman1,†, Abdullah Alghamdi1,†, Shuho Nozue1, Abdulrahman I. Alharthi1, YanYan Li1, Kenana Abualsaud1, Amar Tamra1, Ioannis Isaioglou1, Asma S. Al-Amoodi1, Satoshi Habuchi1,*, and Jasmeen S. Merzaban1,*

1Bioscience Program, Biological and Environmental Science and Engineering Division, King Abdullah University of Science and Technology, Thuwal 23955-6900, Saudi Arabia

† These authors contributed equally to this work.

*Correspondence should be addressed to:

[satoshi.habuchi@KAUST.edu.sa](mailto:satoshi.habuchi@KAUST.edu.sa) or jasmeen.merzaban@KAUST.edu.sa

**Supplementary Figures**

**Supplementary Figure 1. Knockdown of CD34, CD43, PSGL1, and Ezrin.** After treatment with bromelain ”B” for 30 min (not the case for Ezrin), WT KG1a cells were transfected with 250–500 pmol of either CD34, Ezrin, PSGL1, CD43, or Scramble siRNA and subjected to western blot analysis.

**Supplementary Figure ‎2. Clustering of CD44 and Ezrin were disrupted due to CD34 knockdown. (A)** On fixed sCT-KG1a cells and CD34-KD KG1a cells, CD34 and CD44 molecules (left panels) as well as CD34 and P-Ezrin molecules (right panels) were immunolabeled with Alexa Fluor 488 or Alexa Fluor 647 secondary antibodies, respectively. The cells were then imaged using a super-resolution imaging platform. Super-resolution images of both molecules are shown. **(B)** On fixed sCT KG1a cells and CD43, Ezrin, or PSGL1 knockdown KG1a cells, CD34 and CD44 molecules were immunolabeled with Alexa Fluor 488 or Alexa Fluor 647 secondary antibodies, respectively. The cells were then imaged using a super-resolution imaging platform. Super-resolution images of both molecules are shown.

**Supplementary Figure 3. CD34 constructs in HEK293ft cells**. Western blot analysis of “HEK (Vector Control)”, “HEK-CD34,” and “HEK-∆EC” cells shows the confirmation of CD34 expression. The blot was derived after incubation with a CD34 antibody targeting the intercellular tail of CD34.

**Supplementary Figure 4. CD34 on HEK-CD34 cells cannot bind to E-selectin without decoration with an sLex epitope.** HEK and HEK-CD34 cells were left unstained or incubated with either HECA452 primary antibody (Sialyl Lewis X epitope detection) or E-selectin for 30 min, with or without FUT6 treatment, followed by incubation with a PE-conjugated secondary antibody. “E-Selectin” indicates cells incubated with E-selectin. “HECA452” indicates cells incubated with HECA452 antibodies. “FUT6” indicates cells treated with FUT6 for Sialyl Lewis X decoration. **(A)** Flow cytometry revealed that HEK cells did not show Sialyl Lewis X expression (left panel) and did not bind to E-selectin (right panel). The same results were observed in HEK-CD34 cells. **(B)** Following FUT6 treatment, a significant increase in the signal of HEC452 (left panel) and E-selectin binding (right panel) in both HEK and HEK-CD34 cells are observed. **(C)** Mean fluorescence intensity (MFI) images were collected after flow cytometry analysis of each of the indicated samples and depicted in a bar chart. Results from n=3 experiments are shown. Statistical analysis in this figure was performed using two-way ANOVA using GraphPad Prism software (****P < 0.0001).
